# Supplementary material for: Investigation on UV Degradation and Mechanism of 6:2 Fluorotelomer Sulfonamide Alkyl Betaine, Based on Model Compound Perfluorooctanoic Acid
Source: MDPI journal article supplement (doi:10.3390/chemengineering8020032), 2024-03-06
Supplement: s1 [file s1]

Archive with 1 entries (1 files):
- ChemEngineering-2824275-supplementary.pdf
